# Supplementary material
Source: PubMed Central journal article supplement (PMC4617315)
Supplement: NIHMS730110-supplement-Supplemental_material.pdf [file NIHMS730110-supplement-Supplemental_material.pdf]

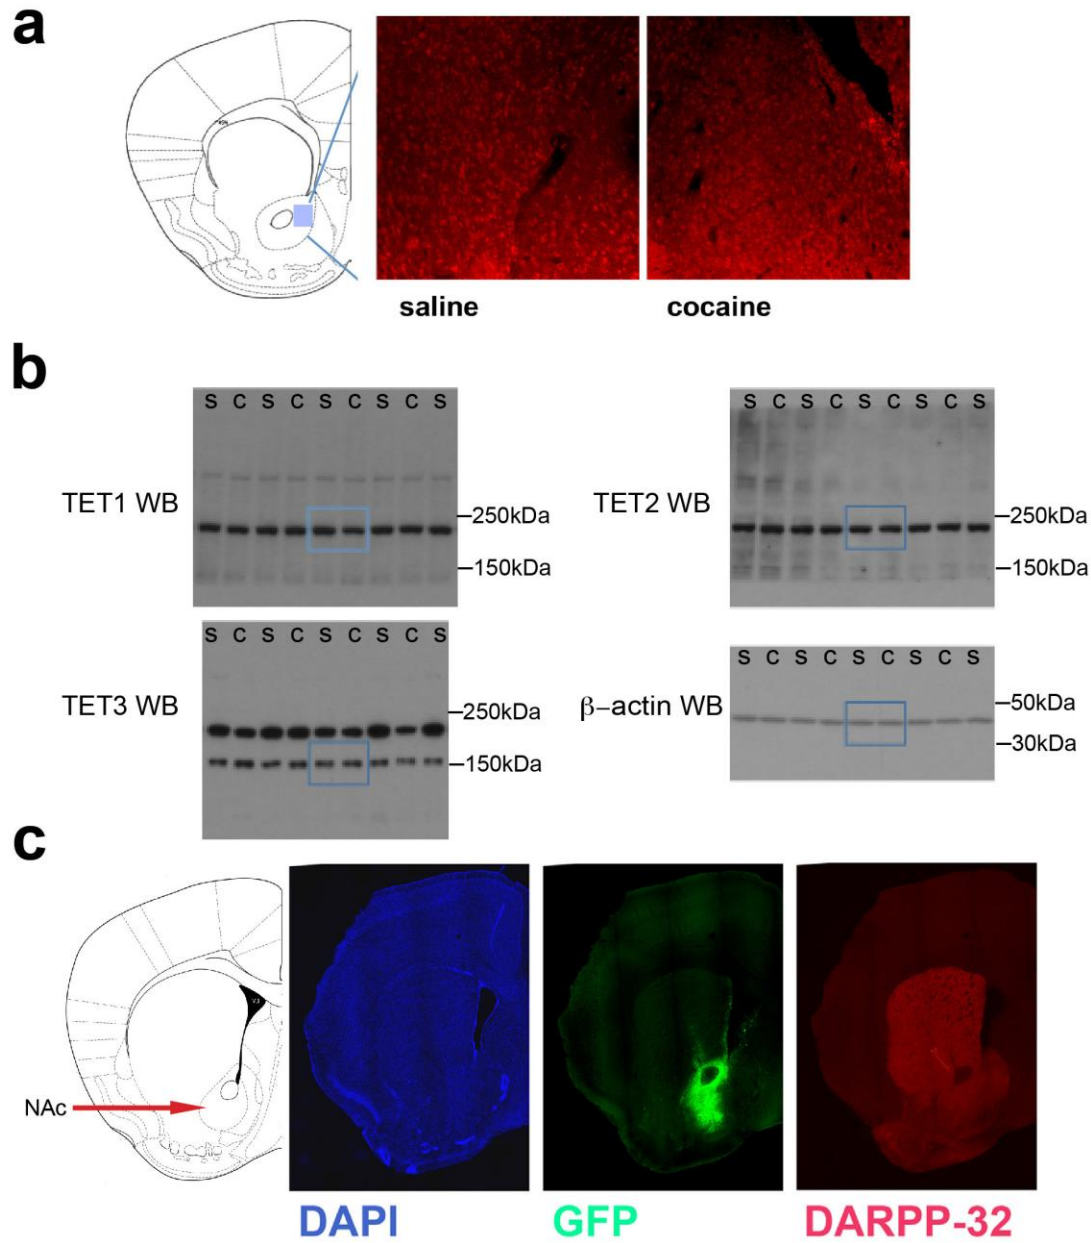

**Supplementary Figure 1**

**Representative immunohistochemistry images and TET western blots.**

**a**, TET1 staining in NAc of mice treated with repeated cocaine or saline. A decrease in TET1 levels after cocaine is seen. **b**, Full length western blots for TET1, TET2, TET3, and  $\beta$ -actin. Saline (s) and cocaine (c) samples were loaded alternatively. The blue rectangles demonstrate the lanes cropped in **Figure 1c**. **c**, DAPI/GFP/DARPP-32 staining of a mouse brain section after viral injection. DAPI staining demonstrates intact brain structure of the injected hemisphere. GFP staining illustrates the spread of viral-mediated transgene expression in NAc. DARPP-32 immunohistochemistry indicates intact striatum structure after viral injection.

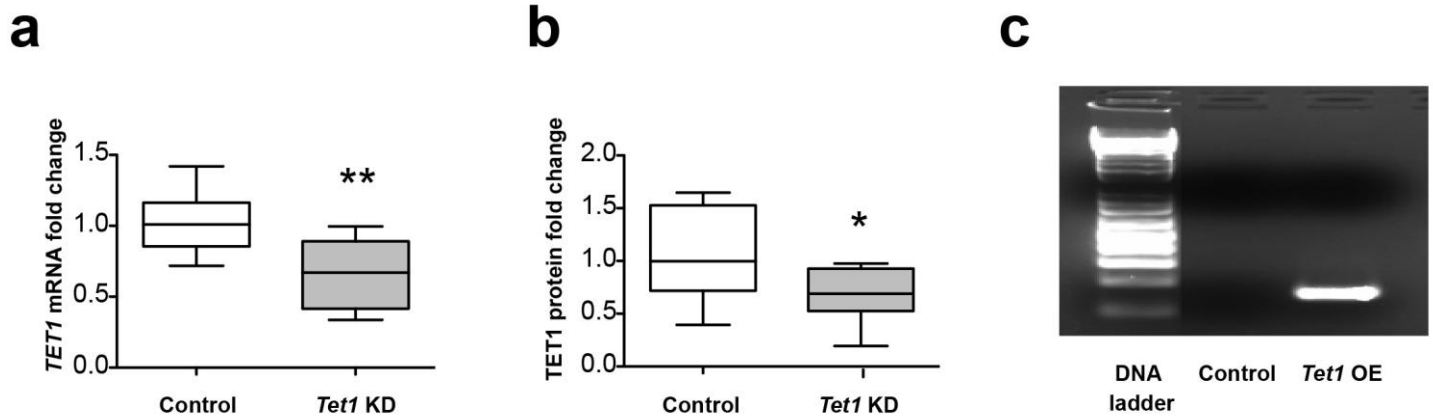

## Supplementary Figure 2

### Validation of virally mediated *Tet1* shRNA knockdown and overexpression.

**a**, qPCR indicates *Tet1* transcript levels are decreased after *Tet1* viral knockdown (KD) in NAc. Student unpaired *t*-test  $P=0.0026$ ,  $t(18)=3.494$ .  $N=10$  per group. **b**, Quantification by Western blotting confirms TET1 protein levels are also decreased after *Tet1* viral knockdown in this brain region. Student unpaired *t*-test,  $P=0.047$ ,  $t(12)=1.805$ .  $N=8$  per group. Box plots present, in ascending order, minimum sample value, first quartile, median, third quartile, maximum sample value. \* indicates  $P<0.05$ , \*\* indicates  $P<0.01$ . **c**, DNA gel electrophoresis picture demonstrates the specific amplification of human *TET1* that is encoded by the viral overexpression (OE) construct in mouse NAc.

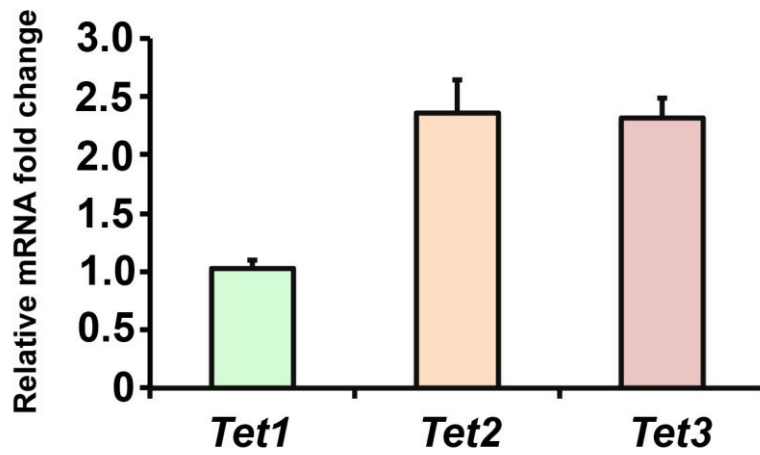

**Supplementary Figure 3**

**Relative expression of *Tet* mRNAs in adult mouse NAc.**

qPCR analysis demonstrates relative abundance of *Tet1*, *Tet2*, and *Tet3* transcripts in adult male mouse NAc. N=9 per group. Data are presented as mean ± SEM.

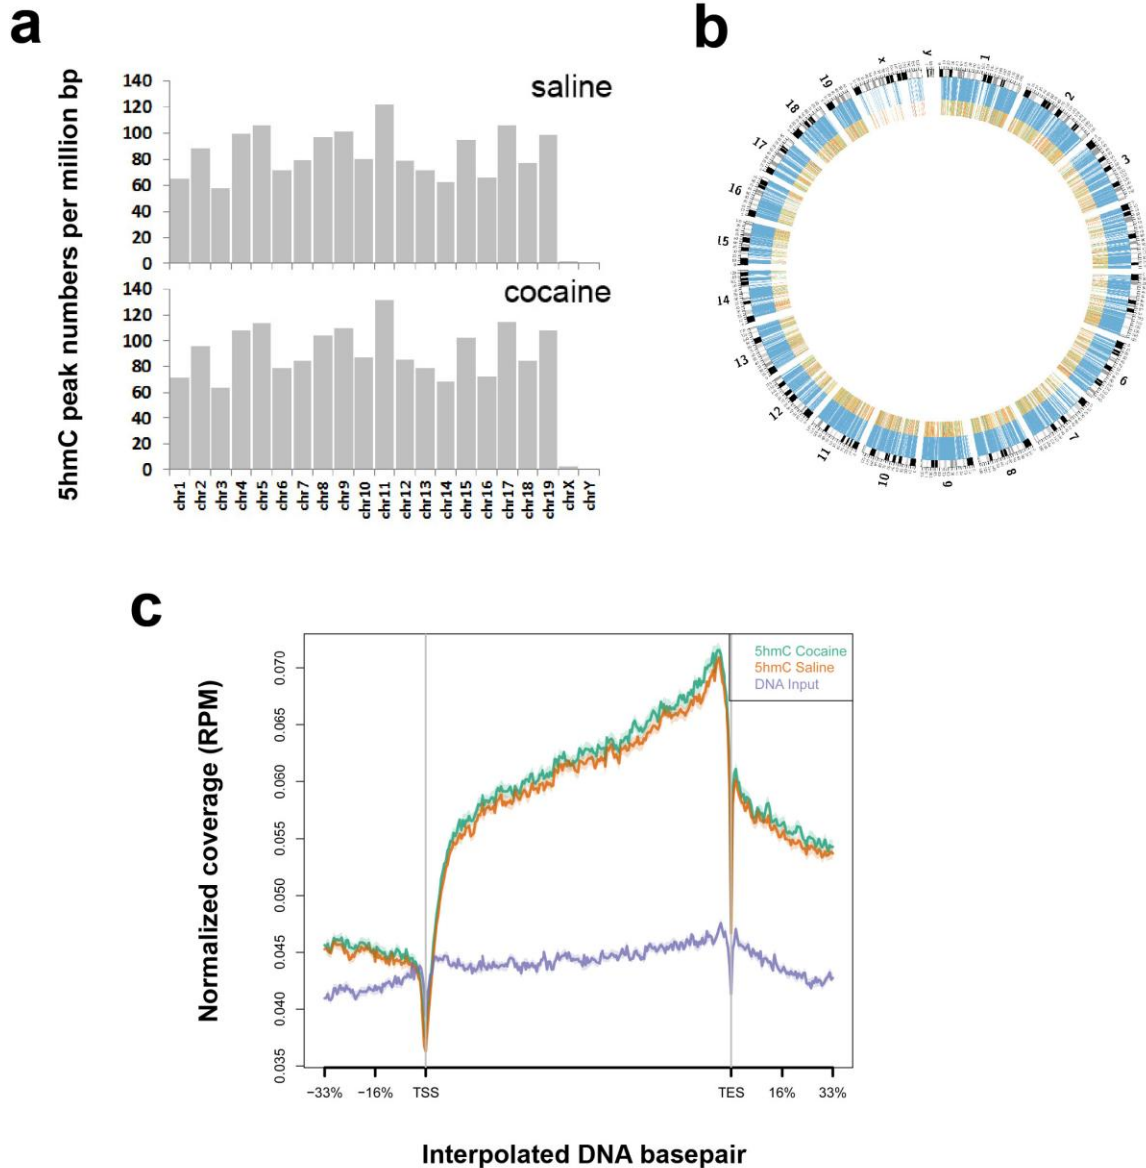

#### Supplementary Figure 4

#### Distribution of 5hmC-enriched regions in NAc of saline- and cocaine-treated mice.

**a**, Histogram of 5hmC peak counts (in numbers per million bp sequencing reads) of each chromosome in saline and repeated cocaine samples. **b**, Circular layout of 5hmC peaks under saline conditions in blue bars below the black-white ideogram along chromosomal coordinates. 5hmC differential sites after repeated cocaine are shown in yellow (red/green) bars of the inside circle. **c**, Coverage plot of 5hmC peak regions under saline (orange color) and cocaine (green color) conditions from transcription start sites (TSSs) to transcription ending sites (TESs), as well as up- and downstream regions, of genes genome-wide. The coverage of up- and downstream interpolated 33% sequence is also shown. DNA input trace is in purple color.

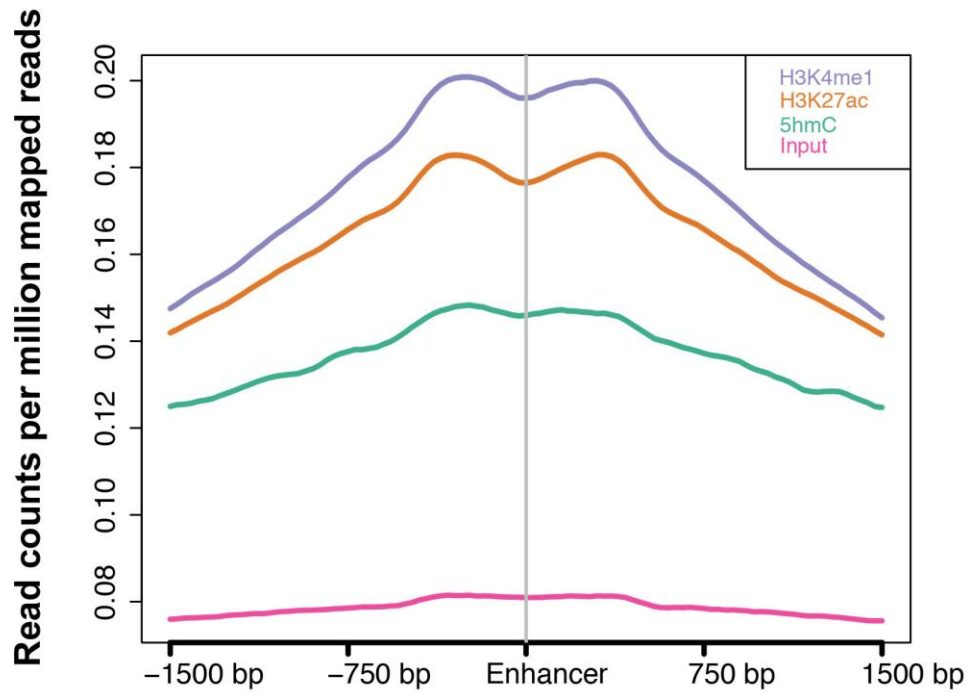

**Supplementary Figure 5**

**Selective enrichment of H3K4me1, H3K27ac and 5hmC at enhancer regions.**

ChIP-seq for H3K4me1 and H3K27ac as well as 5hmC-seq are plotted over the mouse brain enhancer regions defined by the ENCODE project (<http://genome.ucsc.edu/ENCODE/>). Coverage plot of H3K4me1 (blue color), H3K27ac (orange color), and 5hmC (green color) from 1500 bp up- and downstream of enhancer sites reveals their enrichment at enhancer regions as demonstrated by sequencing read counts while compared to input which has similar read counts as H3K4me3 (data not shown).

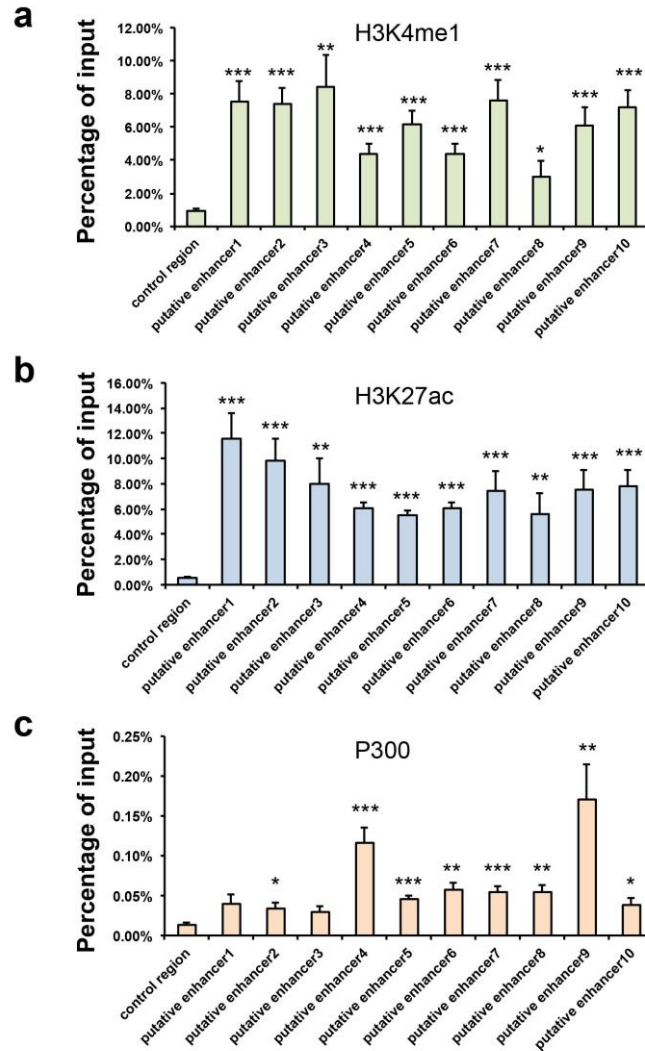

**Supplementary Figure 6**

**ChIP-qPCR validation of putative enhancers.**

**a**, H3K4me1 ChIP followed by qPCR from a separate cohort of animals display significant enrichments of H3K4me1 at 10 putative enhancer sites as predicted by H3K4me1 and H3K27ac ChIP-seq co-binding. Student's unpaired t-test for enhancers1 to 10:  $P=0.00008$ ,  $t(14)=5.455$ ;  $P=0.00001$ ,  $t(14)=6.832$ ;  $P=0.00143$ ,  $t(14)=3.958$ ;  $P=0.00005$ ,  $t(14)=5.713$ ;  $P=0.00001$ ,  $t(14)=6.527$ ;  $P=0.00005$ ,  $t(14)=5.717$ ;  $P=0.00013$ ,  $t(14)=5.213$ ;  $P=0.04619$ ,  $t(14)=2.187$ ;  $P=0.00050$ ,  $t(14)=4.495$ ;  $P=0.00004$ ,  $t(14)=5.842$ .  $N=8$ /group. **b**, similar validation is observed for H3K27ac ChIP enrichment on the same putative enhancer sites. Student's unpaired t-test for enhancers1 to 10:  $P=0.00008$ ,  $t(14)=5.507$ ;  $P=0.00008$ ,  $t(14)=5.481$ ;  $P=0.00255$ ,  $t(14)=3.665$ ;  $P=2.94444E-08$ ,  $t(14)=10.97$ ;  $P=3.7615831E-09$ ,  $t(14)=12.88$ ;  $P=2.9862057E-08$ ,  $t(14)=10.95$ ;  $P=5.1980284E-04$ ,  $t(14)=4.479$ ;  $P=0.00624$ ,  $t(14)=3.214$ ;  $P=0.00042$ ,  $t(14)=4.586$ ;  $P=0.00007$ ,  $t(14)=5.566$ .  $N=8$ /group. **c**, P300 ChIP demonstrates an enrichment at most of the 10 putative enhancer sites. Student's unpaired t-test for enhancers1 to 10:  $P=0.06760$ ,  $t(11)=2.01$ ;  $P=0.01612$ ,  $t(11)=2.839$ ;  $P=0.08876$ ,  $t(11)=1.881$ ;  $P=0.00036$ ,  $t(11)=5.071$ ;  $P=0.00026$ ,  $t(11)=5.241$ ;  $P=0.00123$ ,  $t(11)=4.312$ ;  $P=0.00091$ ,  $t(11)=4.477$ ;  $P=0.00155$ ,  $t(11)=4.177$ ;  $P=0.00820$ ,  $t(11)=3.212$ ;  $P=0.02076$ ,  $t(11)=2.748$ . All putative enhancer bindings are compared to a non-putative enhancer control region at OCT4 gene promoter (-400bp to -550bp). All experiments are done under saline basal condition. The 10 randomly selected putative enhancer sites are chr8:124192000-124192600, chr12:32746400-32746800, chr13:49223800-49225000, chrX:53603400-53603600, chr13:74702000-74702200, chr18:38527400-38527600, chr12:118582600-118583200, chr17:25690800-25691000, chr9:61420400-61421200, chr3:90251000-90251400. Control  $n=6$ /group, enhancer  $n=7$ /group. Data are presented as mean  $\pm$  SEM. \* indicates  $P<0.05$ , \*\* indicates  $P<0.01$ , \*\*\* indicates  $P<0.001$ .

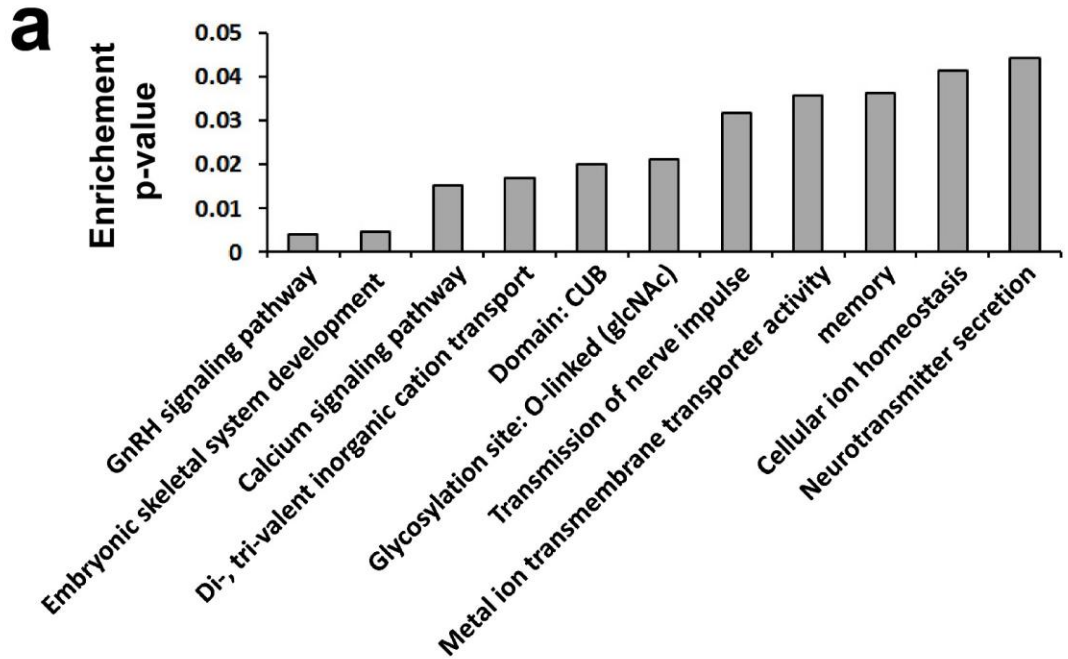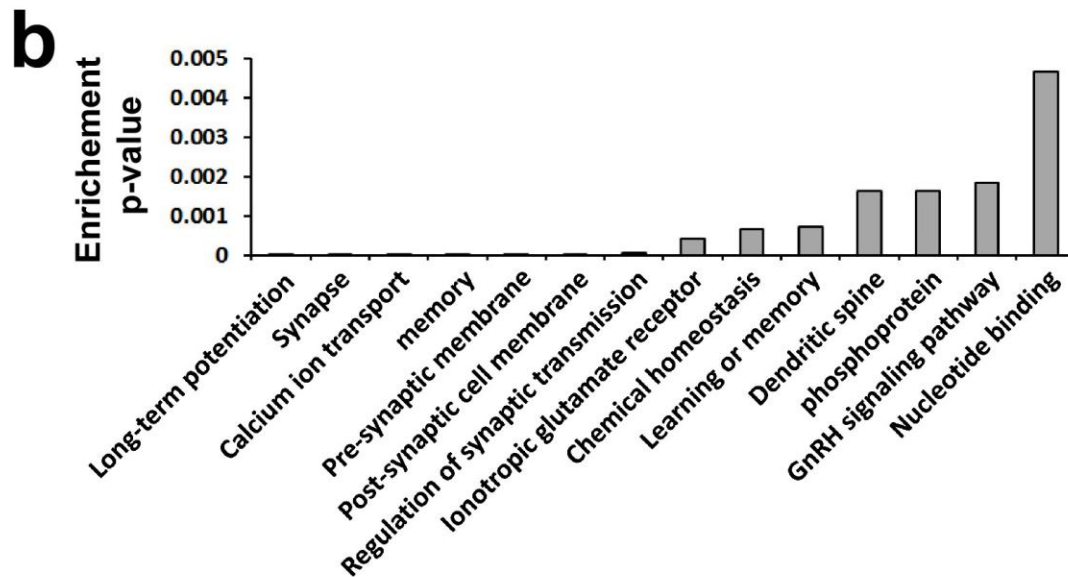

Supplementary Figure 7

Gene ontology of genes that show cocaine-induced changes by both 5hmC-seq and RNA-seq.

**a**, Gene ontology of the most significant enriched functional annotation groups of genes that display both mRNA induction (24 hr) and gene body 5hmC induction. **b**, Gene ontology of the most significant enriched annotation groups of genes that display both mRNA induction (4 hr after a cocaine challenge) and gene body 5hmC induction prior to the challenge dose of cocaine.

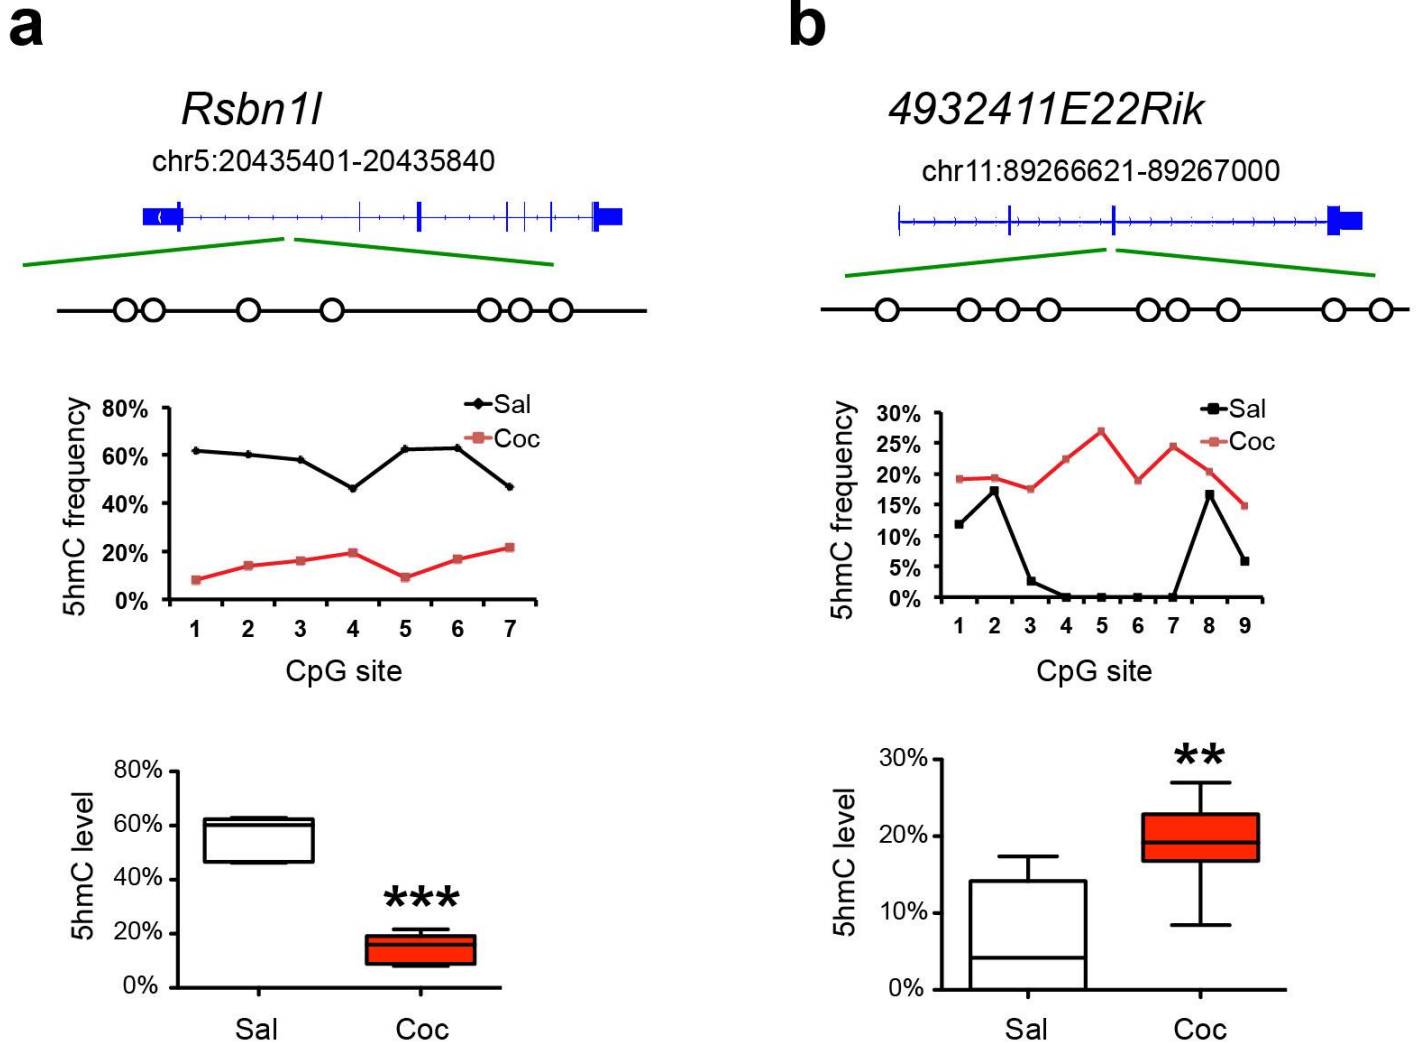

Supplementary Figure 8

oxBS-seq methodology validation.

Two loci with a significant increase (*4932411E22Rik*) or decrease (*Rsb11*) of 5hmC in NAc after repeated cocaine were selected from 5hmC-seq analysis. **a**, oxBS-seq confirmed that *Rsb11* shows decreased 5hmC frequency at all seven CpG sites. This decrease is statistically significant across the *Rsb11* locus. Student paired *t*-test,  $P=3.12E-08$ ,  $t(6)=9.501$ . **b**, oxBS-seq confirmed that *4932411E22Rik* displays increased 5hmC frequency at most CpG sites tested. This increase is statistically significant across the *4932411E22Rik* locus. Student paired *t*-test,  $P=0.005$ ,  $t(9)=3.687$ .  $N=1-2$  biological replicates/condition. Box plots present, in ascending order, minimum sample value, first quartile, median, third quartile, maximum sample value. \*\* indicates  $P<0.01$ , \*\*\* indicates  $P<0.001$ .



**Supplementary Table 1. Sequencing data summary: quality control analysis.**

| sequencing sample | treatment | biological replicate | total_reads | unique_mapped_reads | suppressed_multiple_mapped_reads | dup_reads  | Normalized Strand Cross-correlation coefficient (NSC) | Relative Strand Cross-correlation coefficient (RSC) |
|-------------------|-----------|----------------------|-------------|---------------------|----------------------------------|------------|-------------------------------------------------------|-----------------------------------------------------|
| 5hmC capture seq  | cocaine   | 1                    | 53,506,844  | 29,050,796          | 3,232,508                        | 8,080,990  | 1.131166                                              | 1.78968                                             |
| 5hmC capture seq  | cocaine   | 2                    | 55,484,874  | 29,892,092          | 4,374,056                        | 12,366,589 | 1.125905                                              | 2.042943                                            |
| 5hmC capture seq  | cocaine   | 3                    | 59,113,826  | 33,305,418          | 3,764,785                        | 10,190,299 | 1.135387                                              | 1.634807                                            |
| 5hmC capture seq  | input     | 1                    | 23,431,846  | 18,481,018          | 4,549,360                        | 938,430    | 1.013705                                              | 0.5169814                                           |
| 5hmC capture seq  | saline    | 1                    | 62,494,817  | 35,041,044          | 5,207,006                        | 10,096,461 | 1.086806                                              | 1.975856                                            |
| 5hmC capture seq  | saline    | 2                    | 53,710,729  | 30,011,210          | 3,914,698                        | 9,352,472  | 1.1162                                                | 1.616004                                            |
| 5hmC capture seq  | saline    | 3                    | 56,310,244  | 26,278,274          | 3,242,848                        | 5,712,005  | 1.117337                                              | 1.356048                                            |
| H3K27ac ChIPseq   | cocaine   | 1                    | 229,709,230 | 175,096,234         | 4,727,926                        | 22,581,443 | 1.065739                                              | 1.049676                                            |
| H3K27ac ChIPseq   | cocaine   | 2                    | 218,846,752 | 172,922,245         | 4,822,984                        | 20,979,535 | 1.063471                                              | 1.058677                                            |
| H3K27ac ChIPseq   | cocaine   | 3                    | 223,097,857 | 172,359,715         | 5,004,955                        | 18,202,651 | 1.063476                                              | 1.057878                                            |
| H3K27ac ChIPseq   | saline    | 1                    | 217,535,912 | 155,757,197         | 4,363,260                        | 15,368,259 | 1.06728                                               | 1.049129                                            |
| H3K27ac ChIPseq   | saline    | 2                    | 228,476,479 | 177,862,421         | 5,097,915                        | 20,477,853 | 1.063189                                              | 1.057762                                            |
| H3K27ac ChIPseq   | saline    | 3                    | 217,635,175 | 137,125,779         | 3,909,253                        | 13,269,955 | 1.071743                                              | 1.036415                                            |

  

| sequencing sample | treatment | biological replicate | total_reads | mapped_reads | mitochondrial_RNA_reads | rRNA_reads | mapping_rate | mitochondrial_RNA_rate | rRNA_rate |
|-------------------|-----------|----------------------|-------------|--------------|-------------------------|------------|--------------|------------------------|-----------|
| 4hr RNAseq        | cocaine   | 1                    | 38,962,356  | 36,766,764   | 2,239,550               | 0          | 94           | 6                      | 0         |
| 4hr RNAseq        | cocaine   | 2                    | 40,926,637  | 39,574,235   | 2,394,015               | 0          | 97           | 6                      | 0         |
| 4hr RNAseq        | cocaine   | 3                    | 40,723,069  | 39,414,193   | 2,416,842               | 0          | 97           | 6                      | 0         |
| 4hr RNAseq        | saline    | 1                    | 40,568,820  | 38,278,617   | 2,398,875               | 0          | 94           | 6                      | 0         |
| 4hr RNAseq        | saline    | 2                    | 40,091,363  | 38,871,668   | 1,329,654               | 0          | 97           | 3                      | 0         |
| 4hr RNAseq        | saline    | 3                    | 40,441,794  | 39,276,870   | 2,033,176               | 0          | 97           | 5                      | 0         |

**Supplementary Table 5. Motif analysis of putative enhancer genes**

| <b>category</b>                  | <b>motif name</b> | <b>e-value</b> | <b>distribution</b>    |
|----------------------------------|-------------------|----------------|------------------------|
| cocaine state 4 & saline state 6 | STAT1             | 3.00E-09       | not centrally enriched |
| cocaine state 4 & saline state 6 | Ascl2             | 5.50E-08       | centrally enriched     |
| cocaine state 4 & saline state 6 | Zfp161            | 1.40E-07       | centrally enriched     |
| cocaine state 4 & saline state 6 | HIF1A::ARNT       | 4.40E-05       | centrally enriched     |
| cocaine state 4 & saline state 6 | Zbtb3             | 6.20E-04       | centrally enriched     |
| cocaine state 4 & saline state 6 | TFAP2A            | 1.60E-03       | centrally enriched     |
| cocaine state 4 & saline state 6 | Mafb              | 2.20E-03       | centrally enriched     |
| cocaine state 4 & saline state 6 | Max               | 2.50E-03       | centrally enriched     |
| cocaine state 4 & saline state 6 | Zic3/Zic1         | 4.00E-03       | centrally enriched     |
| cocaine state 4 & saline state 6 | Gmeb1             | 9.60E-03       | centrally enriched     |
| cocaine state 5 & saline state 6 | Myod1/Myf6        | 2.80E-03       | not centrally enriched |
| cocaine state 5 & saline state 6 | Sox10/Irf3        | 9.60E-03       | not centrally enriched |

**Supplementary Table 7. List of primers used**

| gene name            | forward primer               | reverse primer                 | category |
|----------------------|------------------------------|--------------------------------|----------|
| TET 1                | GTCAGGGAGCTCATGGAGAC         | CCTGAGAGCTCTTCCCTTCC           | RT- qPCR |
| TET 2                | GCAAGAGCTCTCAGGGATGT         | AGGTCGCACTCGTACCAAAC           | RT- qPCR |
| TET 3                | CCAAGGCAAAGACCCTAACA         | AGCAACTTCAGTGGCCAGAT           | RT- qPCR |
| GAPDH                | GGGTGTGAACCACGAGAAAT         | GTCTTCTGGGTGGCAGTGAT           | RT- qPCR |
| Human TET1           | CAGCCTGTTCCCGTTCTGG          | AAAACCCGCATGAGGCTGTT           | RT- qPCR |
| Human TET2           | CAGCAGCCAATAGGACATGA         | CCCTCAACATGGTTGGTTCT           | RT- qPCR |
| Human TET3           | CACCAAGAGTCTGCTGGACA         | GGCCAGATCCCAAGTGAGTA           | RT- qPCR |
| Human GAPDH          | ATGACATCAAGAAGGTGGTG         | CATACCAGGAAATGAGCTTG           | RT- qPCR |
| Adcy1                | CGTGGCTGAGGCTACTGAAG         | GGTCACGTCATTGGACCATA           | RT- qPCR |
| Itpr1                | GGAGGACAAGGAAGCATTTG         | TTGTGCCCTTTTCCAACCTC           | RT- qPCR |
| Nxph4                | TCAAGTTCTCGCTGTTGGTG         | GGACGAATTGTGACGGAAGT           | RT- qPCR |
| Hrk                  | AAACTGCTTGTCCCAACCAC         | TGCTTACGGGCTCTTTGACT           | RT- qPCR |
| Ntrk2                | GCTCCTGCGACATCATGTG          | TGTTCTTGCTGCTCTCATTGA          | RT- qPCR |
| Akap6                | AAGAGAAACCGCGACTGAAA         | TCCCTGGTATTCTCGGATTGC          | RT- qPCR |
| Oct4 promoter        | CTGTAAGGACAGGCCGAGAG         | CAGGAGGCCCTTCATTTTCAA          | ChIP     |
| putative enhancer 1  | CTCTCCAGCCACTGTCTTCA         | GCCTTGGTGTGAGAGAGGAT           | ChIP     |
| putative enhancer 2  | AAATGCGGCCTTTGTCTCAG         | AGAGATGCTGCCACTTGTCT           | ChIP     |
| putative enhancer 3  | AGCTGGCCCTGATCATAGTC         | CACACAGAACCAGAGACCCT           | ChIP     |
| putative enhancer 4  | AGACCAAGCTGCTCATCTGT         | TGCGGAATCTGAAGAGGACA           | ChIP     |
| putative enhancer 5  | TGAAATCAAGGTCGCTAGCC         | AAAGGACCTGCAGTTTCCCT           | ChIP     |
| putative enhancer 6  | TGGGAGATAAAGGGCCTGTC         | CCATCTCTCTAGCCCACGAG           | ChIP     |
| putative enhancer 7  | TTTGCCTGCGTGTATGTCTG         | AAGAGAGCTGGAGAGATGGC           | ChIP     |
| putative enhancer 8  | AAAGCTGAGGTGGGGTGTTA         | CAGGTGTGTGGCTGTAAGG            | ChIP     |
| putative enhancer 9  | AGTCCCATATCCCCAGGTCT         | GATGGTTGCTTGGGACTTGG           | ChIP     |
| putative enhancer 10 | AGGTGGAATTGAGCTTGGGA         | AGGTGGCTTTGAAGGTCAGA           | ChIP     |
| Rsb1l                | TGTTTAATTTGAATTTTGTTTTGG     | TCTCTTATCTCTTCTTTATCTATCTTA    | BS       |
| 4932411E22Rik        | TATTTTATTTAAAGTAAATTGATGAAGT | ACTAATACTAATCTAATCTTCCCTACACTC | BS       |
| Adcy1                | TATGGGGATTTTGTGTTGATATATG    | TATAAAAACCTCAACCCACATCTAC      | BS       |
| Itpr1                | TTAGTTTTTTAGTAGTTGGGGTTAA    | AAACATTTACCATAATTCCTATTTCC     | BS       |
| Nxph4                | TAAGGGATTGGTAGGTAGTTGTTAG    | CTATCCCAACCCTTTAACTTAAA        | BS       |
| Hrk                  | GGTTTTGTTTATTAGTTTGAATTTTA   | ACATTAACAACAACCAAAAATACACTCT   | BS       |
| Akap6                | TTTATGAGTGGTTGTATAAGGTGGG    | ACAAAAAATAAACTAAAAACCTTC       | BS       |
| Ntrk2                | TTTTTTTAGTTTTTTTGTAGTTAATAAA | CACATCTCAATAATCAACCACATC       | BS       |
